# Supplementary material
Source: publisher figshare collection journal article supplement (https://tandf.figshare.com/ndownloader/files/22903835)
Supplement: Supplementary file 1 [file 22903835]

*Supplementary tables and figures*

**Supplementary table 1. Methodological quality of the included studies according to the Newcastle-Ottawa Scale.**

| **SNP** | **Author** | **Year** | **Adequacy of Case Definition** | **Representativeness of the Cases** | **Selection of Controls** | **Definition of Controls** | **Comparability Cases/Controls** | **Ascertainment of Exposure** | **Same Method of Ascertainment** | **Non-response rate** |
| --- | --- | --- | --- | --- | --- | --- | --- | --- | --- | --- |
| rs12220909 | Cai | 2016 | * | * | * | * | ** | * | * | NA |
| rs12220909 | Danesh | 2018 | * | * | * | * | * | * | * | NA |
| rs12220909 | Fan | 2017 | * | * | * | * | * | * | * | NA |
| rs12220909 | Li | 2016 | * | * | * | * | * | * | * | NA |
| rs12220909 | Qiu | 2015 | * | * | * | * | ** | * | * | NA |
| rs12220909 | Wei | 2014 | * | * |  |  | * | * | * | NA |
| rs12220909 | Zhang | 2015 | * | * | * | * | ** | * | * | NA |

This table identifies “high” quality choices with a “star”. A study can be awarded a maximum of 1 star for each numbered item within the Selection and Exposure categories. A maximum of 2 stars can be given for Comparability. *, Yes; NA, not applicable. (http://www.ohri.ca/programs/clinical epidemiology/oxford.htm).

**Supplementary table 2. Details of the sensitivity analyses for *miR-4293 rs12220909* polymorphism and cancer risk.**

| **Comparison** | **Study omitted** | **Estimate (95% Confident Interval)** | **Effect Model** |
| --- | --- | --- | --- |
| B vs. A | Cai (2016) | 0.91379046(0.78142834-1.0685728) | **Random** |
|  | Danesh (2018) | 0.92003757(0.81370437-1.0402662) |  |
|  | Fan (2017) | 0.96542698(0.85626155-1.08851) |  |
|  | Li (2016) | 0.91559029(0.78482294-1.0681461) |  |
|  | Qiu (2015) | 0.89839774(0.77660728-1.0392878) |  |
|  | Wei (2014) | 0.90651095(0.77822989-1.0559375) |  |
|  | Zhang (2015) | 0.95687139(0.83544034-1.0959524) |  |
|  | Combined | 0.92459569(0.81146235-1.053502) |  |
|  |  |  |  |
| BB vs. AA | Cai (2016) | 1.0241488(0.82198209-1.2760384) | **Fixed** |
|  | Fan (2017) | 1.1516763(0.92137378-1.4395443) |  |
|  | Li (2016) | 1.0899889(0.86854482-1.3678925) |  |
|  | Qiu (2015) | 1.0929865(0.85640299-1.3949268) |  |
|  | Wei (2014) | 1.0679185(0.85475618-1.3342402) |  |
|  | Zhang (2015) | 1.1353594(0.91347301-1.4111428) |  |
|  | Combined | 1.0928729(0.88981724-1.3422657) |  |
|  |  |  |  |
| BA vs. AA | Cai (2016) | 0.85706347(0.72083426-1.0190384) | **Random** |
|  | Fan (2017) | 0.89968508(0.78849572-1.0265538) |  |
|  | Li (2016) | 0.85074317(0.72125316-1.0034811) |  |
|  | Qiu (2015) | 0.81768334(0.71597737-0.93383682) |  |
|  | Wei (2014) | 0.83522439(0.71035355-0.98204589) |  |
|  | Zhang (2015) | 0.8870436(0.76257712-1.0318252) |  |
|  | Combined | 0.857422760.7446722-0.98724484) |  |
|  |  |  |  |
| BB+BA vs. AA | Cai (2016) | 0.871821580.73256814-1.0375457) | **Random** |
|  | Fan (2017) | 0.923993530.81189162-1.051574) |  |
|  | Li (2016) | 0.870200040.73631561-1.0284287) |  |
|  | Qiu (2015) | 0.842286110.72948527-0.97252935) |  |
|  | Wei (2014) | 0.85606110.7264266-1.0088296) |  |
|  | Zhang (2015) | 0.911768850.78494459-1.0590843) |  |
|  | Combined | 0.878729490.76188438-1.0134944) |  |
|  |  |  |  |
| BB vs. BA+ AA | Cai (2016) | 1.0572317(0.85079092-1.3137645) | **Fixed** |
|  | Fan (2017) | 1.1755786(0.94328606-1.4650754) |  |
|  | Li (2016) | 1.1229265(0.89646578-1.4065946) |  |
|  | Qiu (2015) | 1.1537054(0.90601069-1.4691175) |  |
|  | Wei (2014) | 1.1081054(0.88934517-1.3806762) |  |
|  | Zhang (2015) | 1.1643366(0.93930984-1.4432721) |  |
|  | Combined | 1.1288926(0.92128494-1.3832838) |  |

**Supplementary table 3. *P* values of the Egger’s test for *miR-4293 rs12220909* polymorphism.**

| **Polymorphisms** | **Subgroup** | **Egger’s test P > |t|** |
| --- | --- | --- |
| rs12220909 | Overall | 0.446 |
|  | Asian | 0.446 |
|  | PB | 0.476 |
|  | Y | 0.68 |
